# Supplementary material for: Downregulation of the Sonic Hedgehog/Gli pathway transcriptional target Neogenin-1 is associated with basal cell carcinoma aggressiveness
Source: PubMed Central journal article supplement (PMC5663572; doi:10.18632/oncotarget.21061), 2017-09-19
Supplement: oncotarget-08-84006-s001.pdf [file oncotarget-08-84006-s001.pdf]

## Downregulation of the Sonic Hedgehog/Gli pathway transcriptional target Neogenin-1 is associated with basal cell carcinoma aggressiveness

### SUPPLEMENTARY MATERIALS

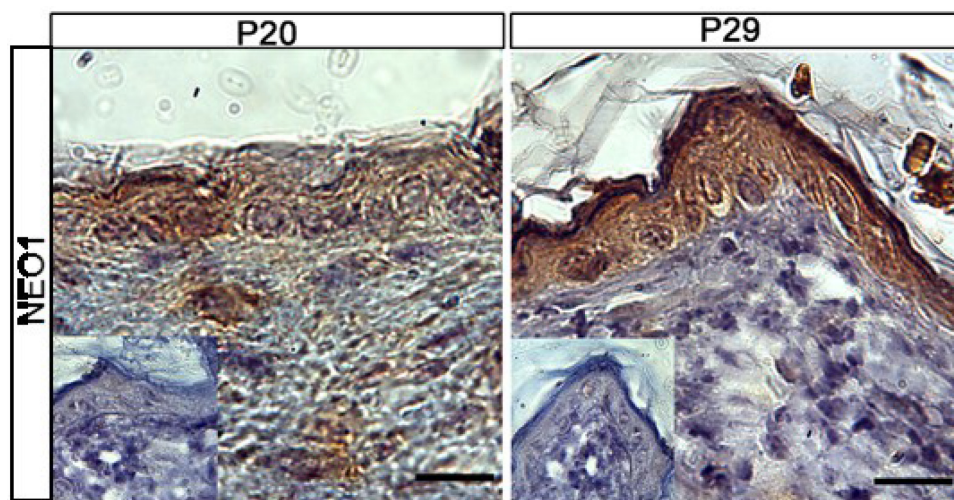

**Supplementary Figure 1: Neo1 is expressed in mouse skin of different ages.** IHC analysis of NEO1 in the basal cell population of mouse skin at P20 and P29. Images are representative photographs of  $n = 3$  on P13 (bar = 25  $\mu\text{m}$ ). Negative controls are shown as insets.

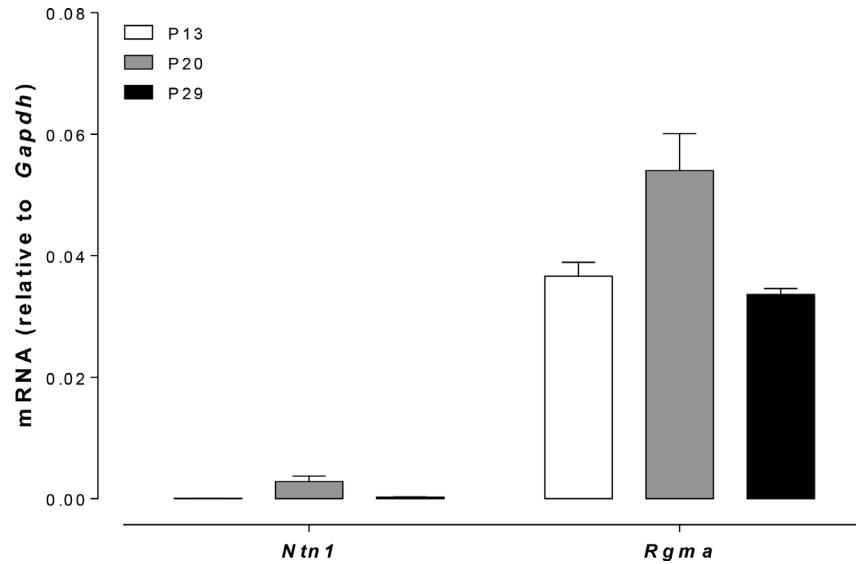

**Supplementary Figure 2: Neo1 ligand expression varies during hair follicle cycle stages.** *Ntn1* and *Rgma* mRNA levels were quantified by qPCR on mouse skin ( $n = 8$ ) at different ages. Data is shown as Mean  $\pm$  SEM and values were normalized using *Gapdh* as housekeeping gene.

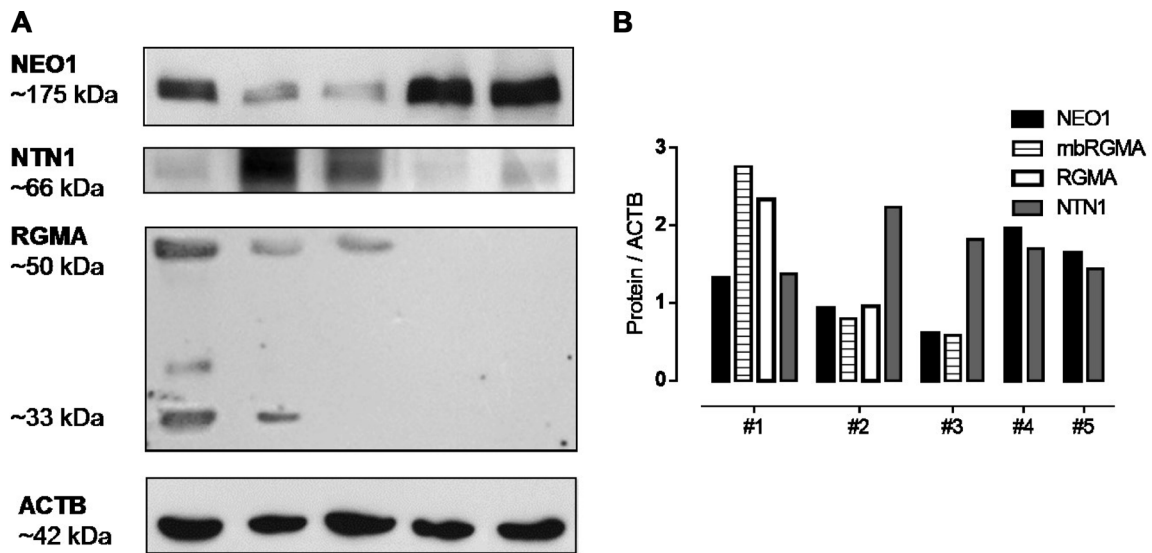

**Supplementary Figure 3: NEO1 and its ligands are expressed in BCC.** (A) NEO1, NTN1 and RGMA expression was assessed by WB in non-aggressive human sporadic BCC samples ( $n = 5$ ), ACTB is shown as a loading control (B) Graph depicting the levels of NEO1, NTN1 and RGMA evaluated in (d) and normalized by ACTB expression.

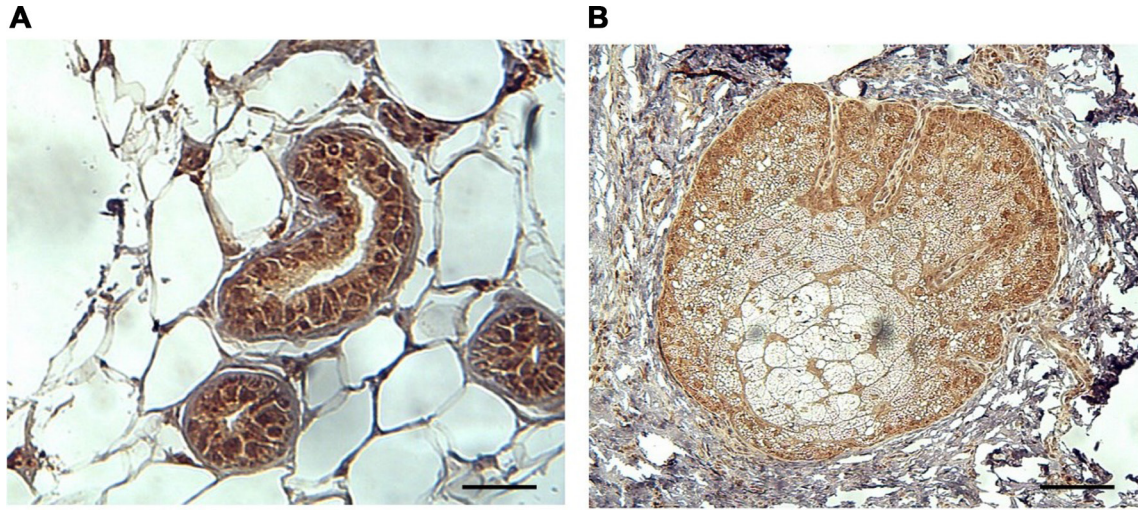

**Supplementary Figure 4: NEO1 is expressed in skin appendages.** IHQ analysis of normal skin dermis, showing NEO1 (brown staining) in both eccrine sweat gland (bar = 250  $\mu$ m) (A) and sebaceous gland (bar = 500  $\mu$ m) (B). Hematoxylin (blue) counterstain used to distinguish nuclei.

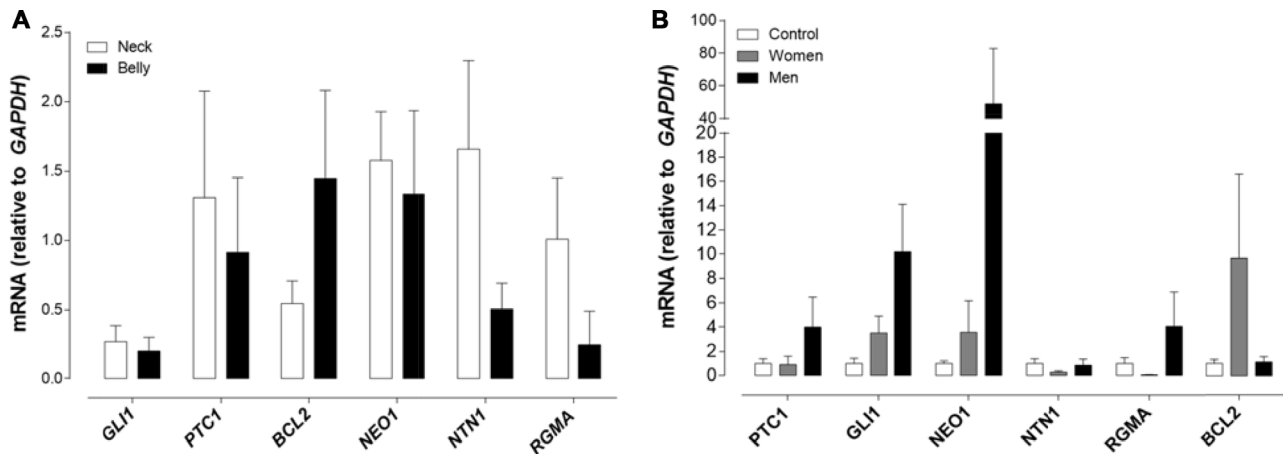

**Supplementary Figure 5: There is no variation in analyzed gene expression according to scission site or donor gender.** (A) mRNA quantification of all gene analyzed on healthy human skin shows no significant variation according to scission site of skin samples. (B) mRNA quantification of all indicated genes shows no significant difference according to donor gender of human BCC samples. Data is shown as Mean  $\pm$  SEM and values were normalized using Gapdh as housekeeping gene.

| PC | Eigenvalue | % variance |
|----|------------|------------|
| 1  | 22732      | 87.073     |
| 2  | 3254.71    | 12.467     |
| 3  | 63.5507    | 0.24343    |
| 4  | 28.9076    | 0.11073    |

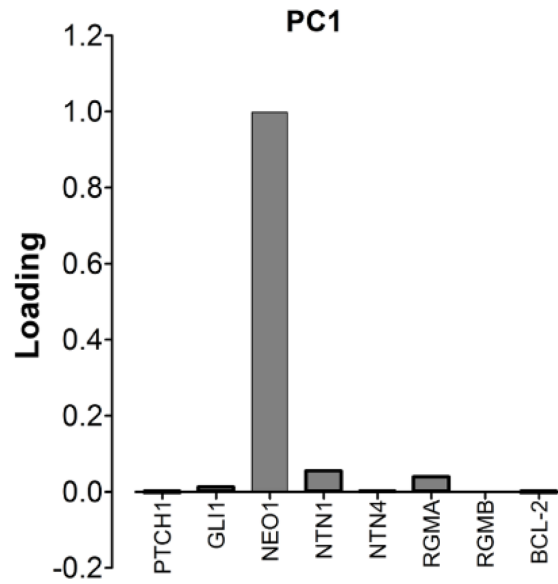

**Supplementary Figure 6: Variance among sporadic human BCC samples is due to NEO1 expression.** PCA of mRNA levels on different human BCC samples ( $n = 32$ ), indicates that most of the variance is explained by NEO1 levels of expression.
